# Supplementary material for: Industrial-scale efficient alkaline water electrolysis achieved with sputtered NiFeV-oxide thin film electrodes for green hydrogen production
Source: Royal Society of Chemistry journal article supplement (doi:10.1039/d3ta05699f), 2023-11-22
Supplement: d3ta05699f1.pdf [file d3ta05699f1.pdf]

1 **Supporting information for**

2 **Industrial-Scale Efficient Alkaline Water Electrolysis Achieved with Sputtered NiFeV-**

3 **Oxide Thin-Film Electrodes for Green Hydrogen Production**

4 Quoc-Nam Ha <sup>a</sup>, Chen-Hao Yeh <sup>b</sup>, Noto Susanto Gultom <sup>a</sup>, Dong-Hau Kuo <sup>a,b,\*</sup>

5

6 <sup>a</sup> Department of Materials Science and Engineering, National Taiwan University of Science and  
7 Technology, #43, Sec. 4, Keelung Road., Taipei 10607, Taiwan

8 <sup>b</sup> Graduate Institute of Energy and Sustainability Technology, National Taiwan University of  
9 Science and Technology, #43, Sec. 4, Keelung Road., Taipei 10607, Taiwan

10

11 \* **Corresponding Author:** [dhkuo@mail.ntust.edu.tw](mailto:dhkuo@mail.ntust.edu.tw)

12

13

14

15

16

17

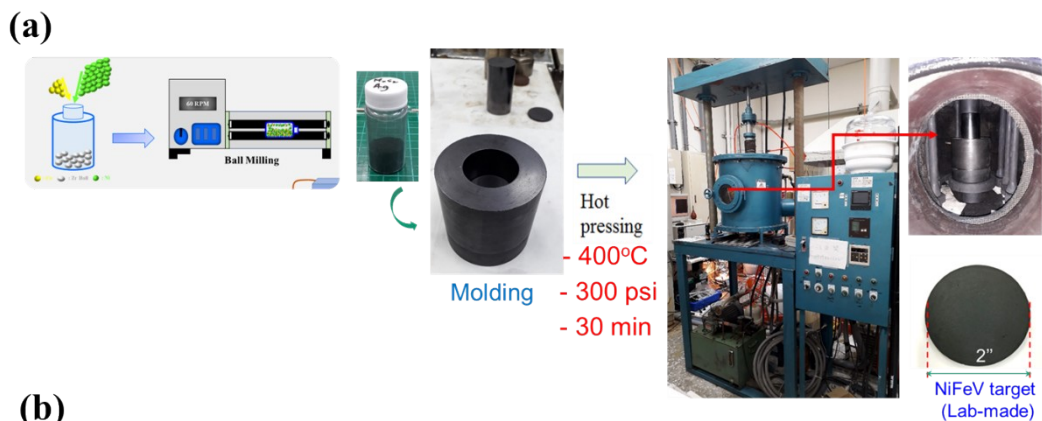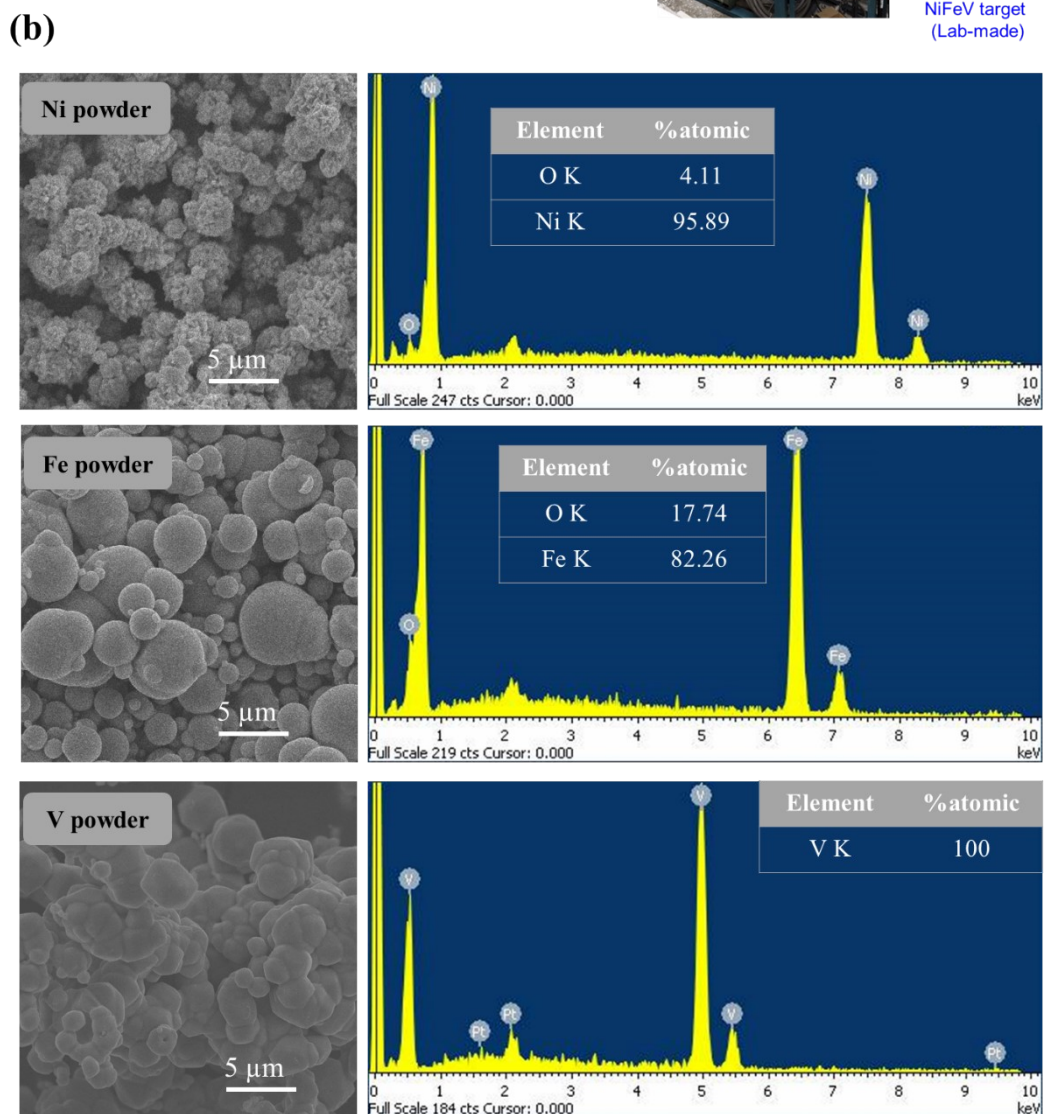

18

19 **Figure S1.** (a) Fabrication procedure of NiFeV target by using our home-built hot press machine.

20

(b) SEM and EDS results of Ni, Fe, and V powder for target fabrication.

21

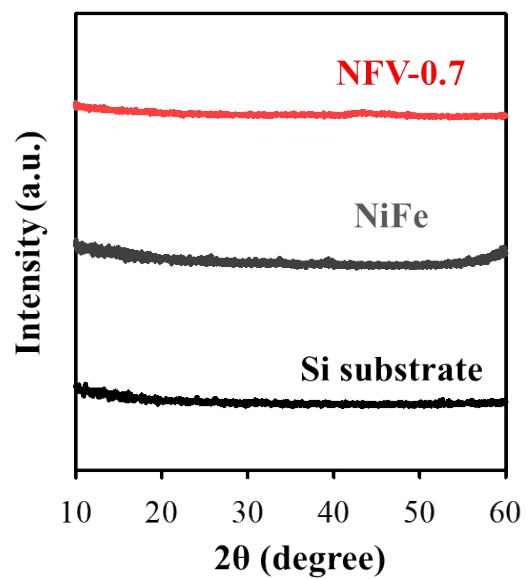

22

23

**Figure S2.** XRD patterns of substrate, NiFe, and NFV-0.7.

24

25

26

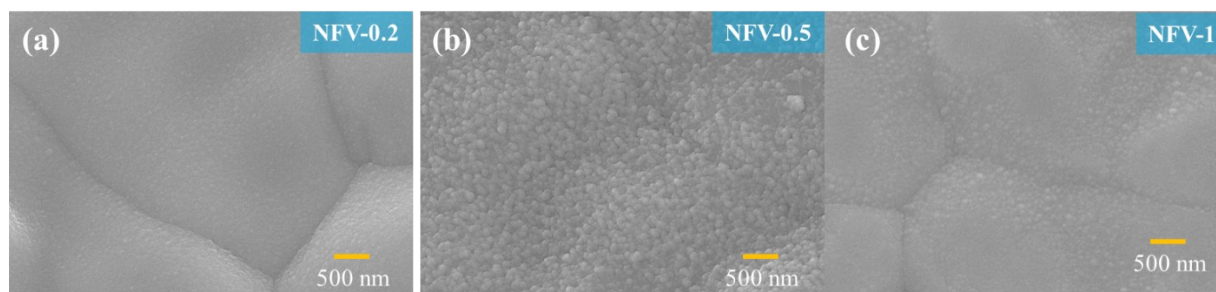

27

28

**Figure S3.** FE-SEM images of (a) NFV-0.2, (b) NFV-0.5, and (c) NFV-1.

29

30

31

32

33

34

35

36

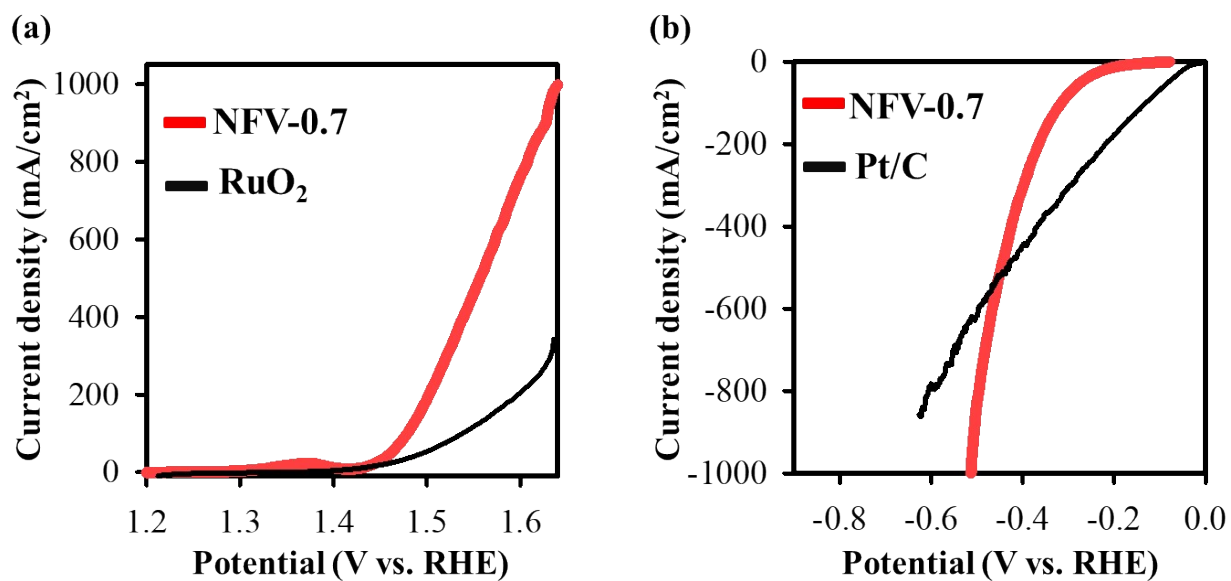

37

38 **Figure S4.** (a) The electrocatalytic performance comparison between our NFV-0.7 and RuO<sub>2</sub> for  
 39 OER and (b) NFV-0.7 and Pt/C for HER.

40

41

42

43

44

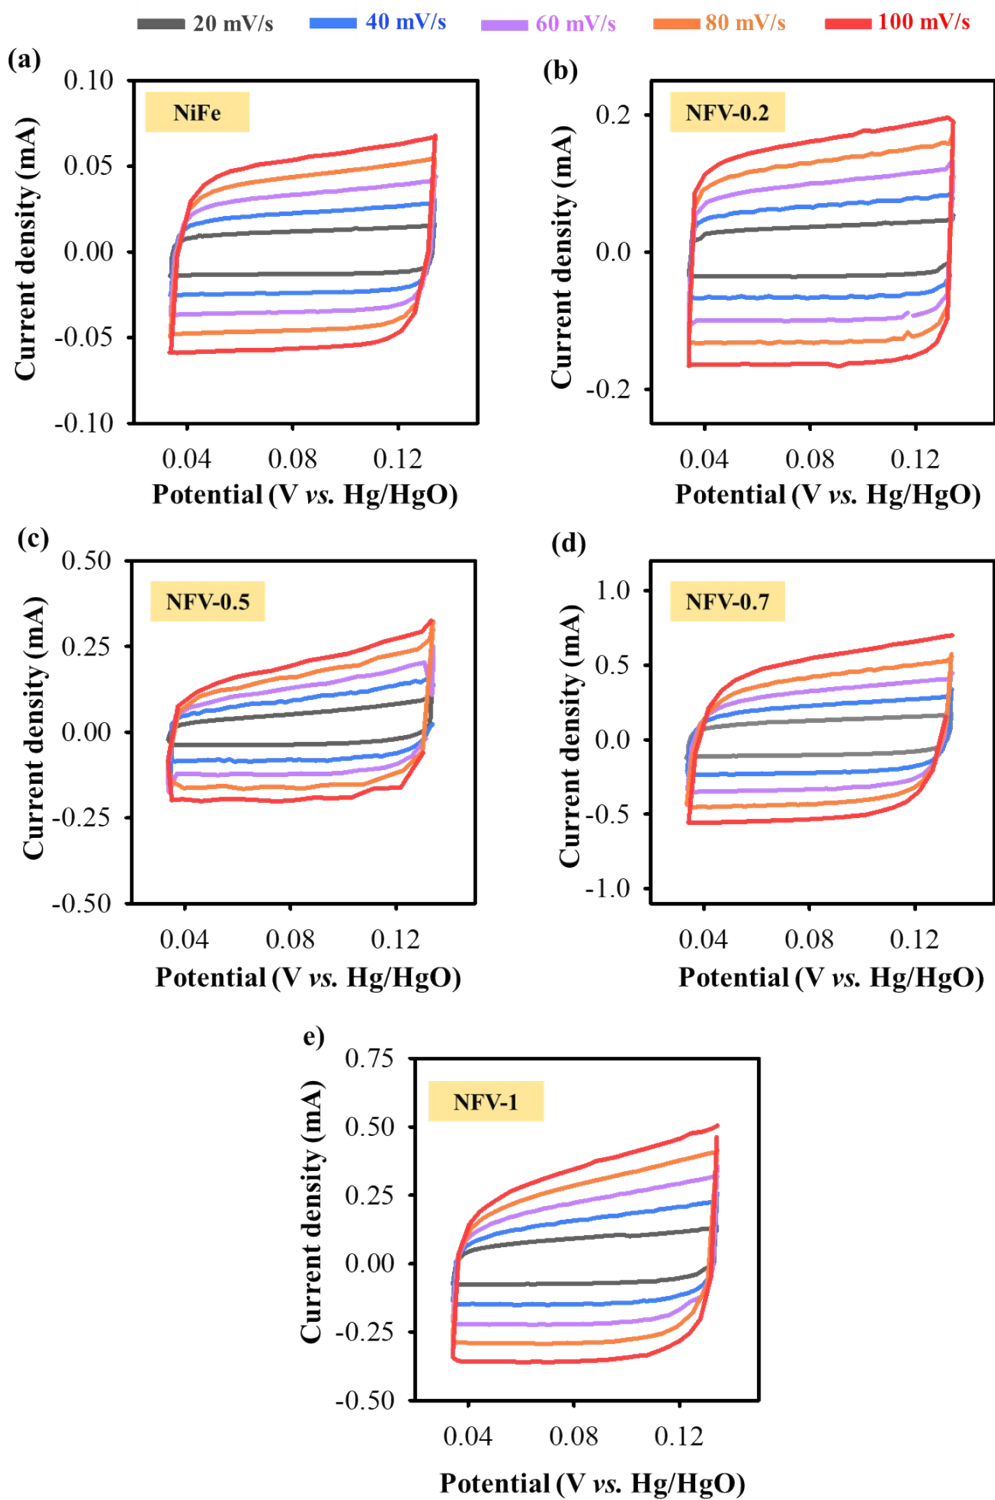

45

46 **Figure S5.** CV curves of (a) NiFe, (b) NFV-0.2, (c) NFV-0.5, (d) NFV-0.7, and (e) NFV-1 at  
 47 different scan rates.

48

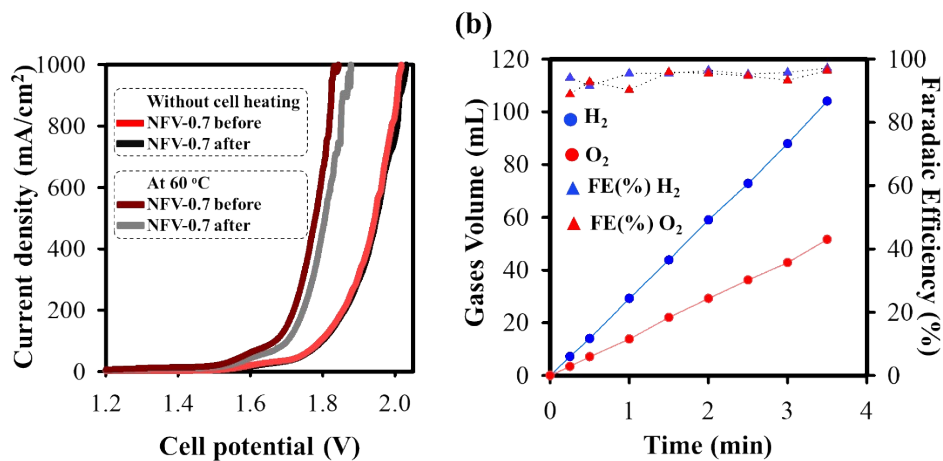

49  
50  
51  
52  
53  
54

**Figure S6.** (a) LSV curves of NFV-0.7 electrolyzer before and after stability tests. (b) Experimental gas production measurement vs. time at 1000 mA/cm<sup>2</sup>, accompanied by their corresponding Faradaic efficiencies.

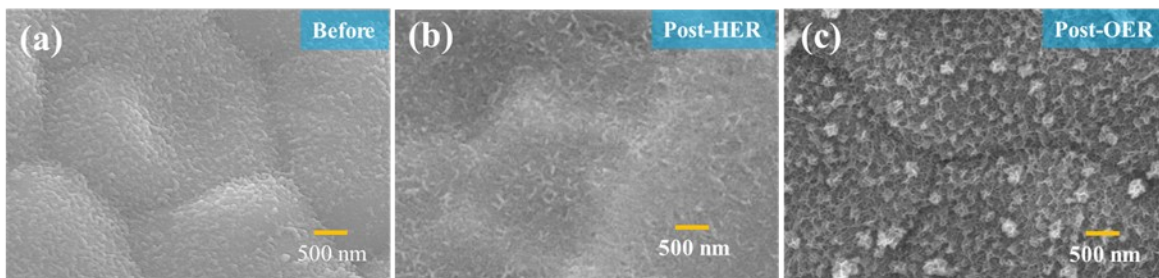

55  
56  
57  
58

**Figure S7.** SEM images of NFV-7 (a) before the stability test, (b) after HER, and (c) after OER.

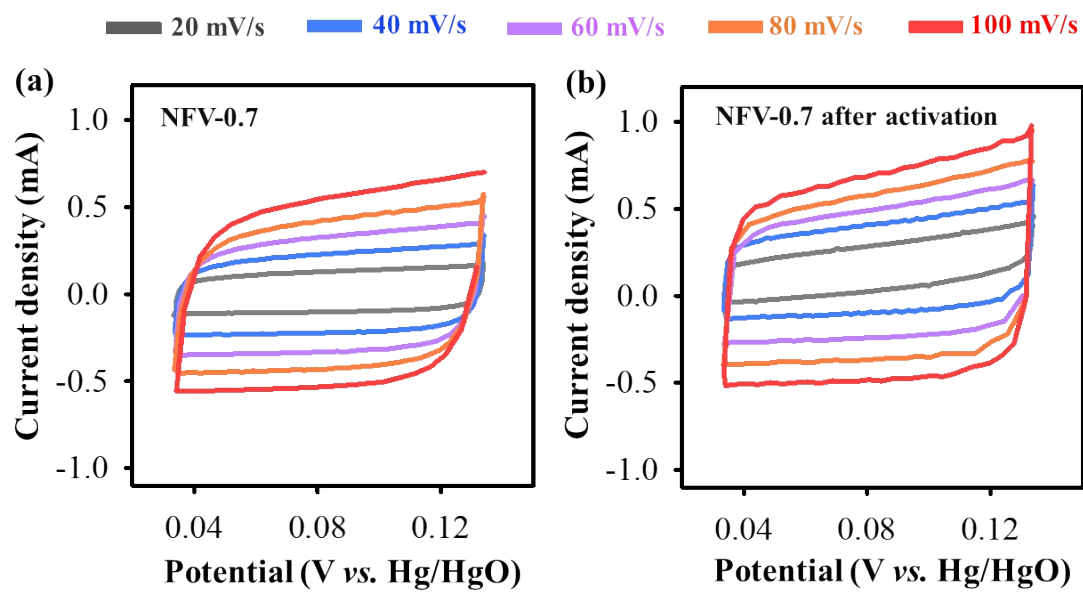

59

60 **Figure S8.** CV curves of NFV-0.7 (a) before and (b) after activation for 200 CV cycles.

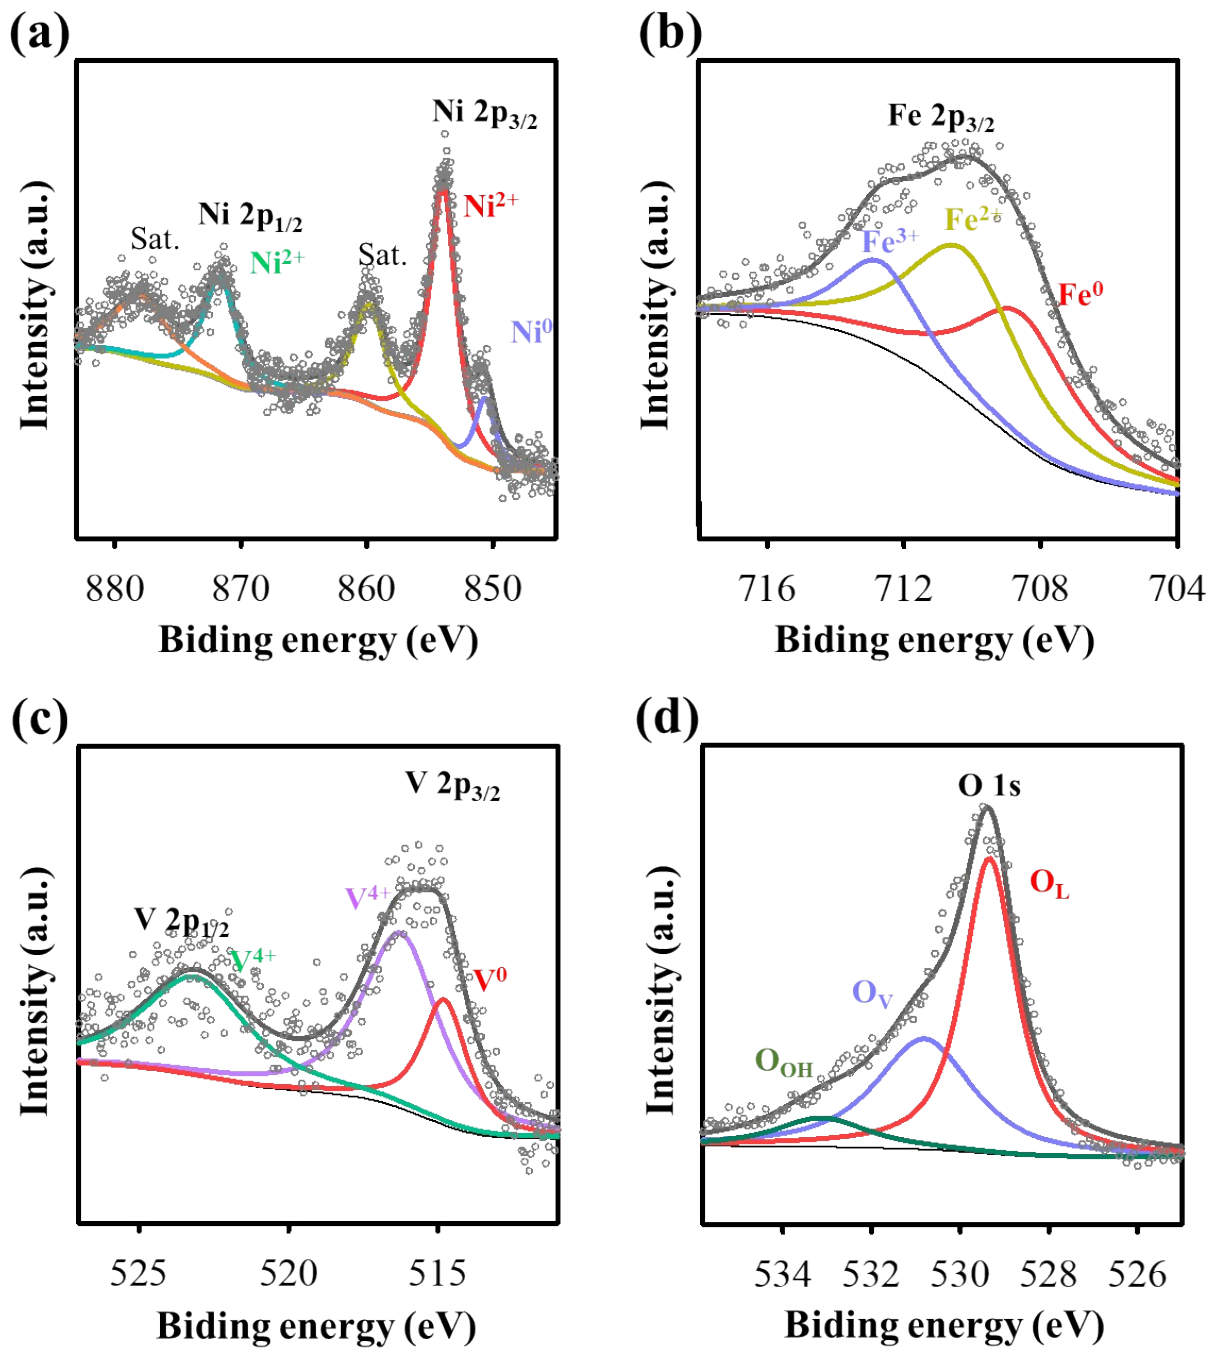

61  
 62  
 63  
 64  
 65  
 66  
 67  
 68

**Figure S9.** High-resolution XPS spectra of (a) Ni 2p, (b) Fe 2p, (c) V 2p, and (d) O 1s of the post-HER NFV-0.7 catalyst.



70 **Table S1.** Atomic percentage of metal elements of NFV-*n* thin films with various V ratios  
 71

| Catalyst       | Atomic(%) |      |      | Ni:Fe:V ratio |             |
|----------------|-----------|------|------|---------------|-------------|
|                | Ni        | Fe   | V    | Target        | Film        |
| <b>NiFe</b>    | 59.3      | 40.7 | -    | 1:1:0         | 1:0.68      |
| <b>NFV-0.2</b> | 52.9      | 40.5 | 6.6  | 1:1:0.2       | 1:0.76:0.11 |
| <b>NFV-0.5</b> | 47.1      | 42.7 | 10.2 | 1:1:0.5       | 1:0.95:0.23 |
| <b>NFV-0.7</b> | 51.0      | 33.4 | 15.6 | 1:1:0.7       | 1:0.67:0.31 |
| <b>NFV-1</b>   | 39.9      | 37.5 | 22.6 | 1:1:1         | 1:0.94:0.56 |

72

**Table S2. The comparison of electrocatalytic OER performance for NFV-0.7 in 1 M KOH with other NiFe-based reported in the literature**

| No. | Catalyst                                         | Method                                   | Overpotential (mV)        |                            |                            |                             | Ref       |
|-----|--------------------------------------------------|------------------------------------------|---------------------------|----------------------------|----------------------------|-----------------------------|-----------|
|     |                                                  |                                          | @10<br>mA/cm <sup>2</sup> | @100<br>mA/cm <sup>2</sup> | @500<br>mA/cm <sup>2</sup> | @1000<br>mA/cm <sup>2</sup> |           |
| 1   | NiFeV                                            | Sputtering                               | 195                       | 250                        | 327                        | 410                         | This work |
| 2   | O-GQD-NiFe P.B.A. 1:20                           | Sputtering                               | 259                       |                            |                            |                             | 1         |
| 3   | Niv(OH) <sub>2</sub> /FeOOH                      | metal ion adsorption method              | 212                       | 261                        |                            |                             | 2         |
| 4   | Ni <sub>3</sub> Fe oxide                         | Hydrothermal synthesis at 550 °C for 4 h | 291                       | 356                        | 447                        |                             | 3         |
| 5   | Co(OH) <sub>2</sub> @NiFe/NF                     | two-step electrodeposition               | 191                       |                            |                            |                             | 4         |
| 6   | NiFeOxHy-C/CNTs/CFP                              | one-step solvothermal method             | 202                       |                            |                            |                             | 5         |
| 7   | Fe-NiS <sub>2</sub> /NCNT                        | hydrothermal method                      |                           | 247                        |                            |                             | 6         |
| 8   | NiFe-NiFe <sub>2</sub> O <sub>4</sub> nanofibers | solution blow spinning                   | 316                       |                            |                            |                             | 7         |
| 9   | cRu-Ni <sub>3</sub> N/NF                         | hydrothermal + nitrogenized              |                           | 278                        |                            |                             | 8         |
| 10  | NiFeW <sub>3</sub> -LDHs                         | immersion treatment                      | 211                       | 256                        |                            |                             | 9         |
| 11  | CS-NiFeCr/NF                                     | Electrodeposition                        | 220                       | 280                        |                            |                             | 10        |
| 12  | NiFeZnP                                          | hydrothermal deposition                  | 203                       |                            |                            |                             | 11        |

**Table S3. The comparison of electrocatalytic HER performance for NFV-0.7 in 1 M KOH with other NiFe-based reported in the literature**

| No. | Catalyst                                                    | Method                           | Overpotential (mV)         |                             |                             |                              | Ref       |
|-----|-------------------------------------------------------------|----------------------------------|----------------------------|-----------------------------|-----------------------------|------------------------------|-----------|
|     |                                                             |                                  | @-10<br>mA/cm <sup>2</sup> | @-100<br>mA/cm <sup>2</sup> | @-500<br>mA/cm <sup>2</sup> | @-1000<br>mA/cm <sup>2</sup> |           |
| 1   | NiFeV                                                       | Sputtering                       | -98                        | -317                        | -447                        | -512                         | This work |
| 2   | NiFeP@TiO <sub>2-x</sub>                                    | electrodeposition                |                            | -273                        |                             |                              | 12        |
| 3   | FeNi-HDNAs                                                  | hydrothermal for 2 h at 400 °C   | -141                       |                             |                             |                              | 13        |
| 4   | Fe-Ni <sub>2</sub> P@PC/Cu <sub>x</sub> S                   | hydrothermal at 60 °C for 20 h   | -113                       |                             |                             |                              | 14        |
| 5   | NiFe <sub>2</sub> O <sub>4</sub> /CoNi-S                    | Solvothermal + Electrodeposition | -149                       |                             |                             |                              | 15        |
| 6   | Ni(OH) <sub>2</sub> @Ni <sub>2</sub> Fe <sub>2</sub> /NF-60 | electrodeposition                |                            | -220                        |                             |                              | 16        |
| 7   | NiFe <sub>EDTA</sub>                                        | hydrothermal at 180 °C for 12 h  | -163                       |                             |                             |                              | 17        |
| 8   | NiFeP@NiP@NF                                                | hydrothermal synthesis           | -105                       |                             |                             |                              | 18        |
| 9   | Mo-doped CoFe LDH/NF                                        | electrochemical transformation   |                            | -227                        | -408                        | -568                         | 19        |
| 10  | Co <sub>9</sub> S <sub>8</sub> @NiFe-LDH-200                | electrosynthesis method          | -145                       | -288                        |                             |                              | 20        |
| 11  | NiFe LDH/(NiFe) <sub>x</sub> /CMT                           | Hydrothermal at 120 °C for 1 h   | -169                       |                             |                             |                              | 21        |
| 12  | NiFe@C                                                      | Hydrothermal at 500 °C for 2 h   | -195                       |                             |                             |                              | 22        |

76

77

78

79

**Table S4. The comparison of the electrocatalytic performance of NFV-0.7 for Overall water splitting with other AEM electrolysis reported in the literature**

| Electrolyte | Catalyst                                                                             |                                                                                      | AEM membrane                   | Operation conditions       |                                       |                        | Ref.             |
|-------------|--------------------------------------------------------------------------------------|--------------------------------------------------------------------------------------|--------------------------------|----------------------------|---------------------------------------|------------------------|------------------|
|             | Anode OER.                                                                           | Cathode HER                                                                          |                                | Cell voltage (V)           | Current density (mA/cm <sup>2</sup> ) | Temp. (°C)             |                  |
| 1 M KOH     | NFV-0.7                                                                              | NFV-0.7                                                                              | FAA3-PK-130                    | <b>1.84</b><br><b>2.00</b> | <b>1000</b>                           | <b>60</b><br><b>25</b> | <b>This work</b> |
| 1M KOH.     | IrO <sub>2</sub>                                                                     | Pt Black                                                                             | PiperION                       | 1.9                        | 1000                                  | 50                     | 23               |
| 0.5M KOH    | IrO <sub>2</sub>                                                                     | Pt/C                                                                                 | FAA3-PK-75                     | 1.8                        | 1000                                  | 90                     | 24               |
| 1M NaOH     | Ni <sub>2</sub> Fe <sub>1</sub>                                                      | Ni <sub>9</sub> Mo <sub>1</sub> /C                                                   | TMA                            | 1.8                        | 906                                   | 60                     | 25               |
| Water       | IrO <sub>x</sub>                                                                     | Pt/C                                                                                 | FAA-3                          | 2.29                       | 500                                   | 50                     | 26               |
| 1M KOH      | Ni/CeO <sub>2</sub> -La <sub>2</sub> O <sub>3</sub> /C                               | CuCoO <sub>x</sub>                                                                   | A201                           | 1.9                        | 470                                   | 55                     | 27               |
| 1 M KOH.    | Co <sub>3</sub> S <sub>4</sub> /NF                                                   | Cu <sub>0.81</sub> Co <sub>2.19</sub> O <sub>4</sub> NS/NF                           | X37-50                         | 2                          | 431                                   | 45                     | 28               |
| DI water    | Ni-Fe                                                                                | Ni-Mo                                                                                | Quaternary ammonia polysulfone | 1.8                        | 400                                   | 70                     | 29               |
| D.I water   | IrO <sub>2</sub>                                                                     | Pt Black                                                                             | A-201 Tokuyama                 | 1.8                        | 399                                   | 50                     | 30               |
| 1M KOH.     | Ni <sub>12</sub> P <sub>5</sub> /Ni <sub>3</sub> (PO <sub>4</sub> ) <sub>2</sub> -HS | Ni <sub>12</sub> P <sub>5</sub> /Ni <sub>3</sub> (PO <sub>4</sub> ) <sub>2</sub> -HS | Y.A.B., Foma                   | 1.8                        | 357.6                                 | 50                     | 31               |
| 1M KOH.     | CoP                                                                                  | CoP                                                                                  | YAB                            | 1.85                       | 335                                   | 50                     | 32               |
| DI water    | Ni                                                                                   | Li <sub>0.21</sub> Co <sub>2.79</sub> O <sub>4</sub>                                 | Cranfield                      | 2.05                       | 300                                   | 45                     | 33               |
| D.I water   | Ni                                                                                   | CeO <sub>2</sub> MnFe <sub>1.8</sub> O <sub>4</sub>                                  | FAA-3-PK-130                   | 1.8                        | 300                                   | 25                     | 34               |
| 0.5M KOH    | IrO <sub>2</sub>                                                                     | Pt/C                                                                                 | A-201, Tokuyama                | 1.8                        | 299                                   | 50                     | 35               |
| 1M KOH      | Ni                                                                                   | Pt-Ni                                                                                | A-201                          | 1.9                        | 250                                   | 50                     | 36               |
| 0.1M KOH.   | Ni/CeO <sub>2</sub> -La <sub>2</sub> O <sub>3</sub> /C                               | CuCoO <sub>x</sub>                                                                   | Mg/Al LDH                      | 2.2                        | 208                                   | 70                     | 37               |
| 1M KOH.     | Ni                                                                                   | Cu <sub>0.7</sub> Co <sub>2.3</sub> O <sub>4</sub>                                   | qPVB/OH-                       | 2                          | 100                                   | 55                     | 38               |
| 10% K.O.H.  | Ni                                                                                   | NiCo <sub>2</sub> O <sub>4</sub>                                                     | qPPO                           | 1.85                       | 135                                   | 50                     | 39               |
| 0.1M KOH.   | Ni                                                                                   | Cu <sub>0.7</sub> Co <sub>2.3</sub> O <sub>4</sub>                                   | Cranfield                      | 1.9                        | 100                                   | 55                     | 40               |

## 80 Faradaic efficiency (FE.)

$$81 \quad FE_{H_2}(\%) = \frac{n_{H_2} \times F \times 2}{j \times t} \times 100\%$$

$$82 \quad FE_{O_2}(\%) = \frac{n_{O_2} \times F \times 4}{j \times t} \times 100\%$$

83 where  $n$  is the amount of generated gas (mol),  $F$  is the Faradaic constant (96 485.3 s A /mol),  $j$  is  
84 current density (A/cm<sup>2</sup>), and  $t$  is time (s).

## 85 Cell efficiency calculation

86 The electrocatalytic efficiency of our single stack cell was calculated according to the below  
87 equation <sup>41</sup>:

$$88 \quad \text{Cell efficiency (\%)} = \frac{H_2 \text{ power}}{\text{Electrolyzer power}} \times 100\%$$

89 The following equation calculated the H<sub>2</sub> power:

$$90 \quad H_2 \text{ power} \left( \frac{W}{cm^2} \right) = \text{hydrogen production rates} \left( \frac{mol}{s \cdot cm^2} \right) \times \text{lower heating value (L.H.V.)}$$

91 Theoretically, the hydrogen production rate at 1000 mA/cm<sup>2</sup> is approximately 5.18×10<sup>-6</sup>  
92 mol/s.cm<sup>2</sup>. A lower heating value (LHV) of 242,000 J/mol was used for H<sub>2</sub> power output.

93 Then, the H<sub>2</sub> power output is 1.25 W/cm<sup>2</sup>

94 The following equation calculates the power of alkaline cell electrolysis:

95 ➤ At 25 °C

$$96 \quad \text{Cell power} \left( \frac{W}{cm^2} \right) = \text{cell voltage (V)} \times \text{current density} \left( \frac{A}{cm^2} \right)$$

$$97 \quad \text{Cell power} \left( \frac{W}{cm^2} \right) = 2.00 \times 1 = 2.00$$

98 Finally,

$$99 \quad \text{Cell efficiency (\%)} = \frac{1.25}{2.00} \times 100\% = 62.5\%$$

100 ➤ At 60 °C

$$101 \quad \text{Cell power} \left( \frac{W}{cm^2} \right) = 1.84 \times 1 = 1.84$$

102 Finally,

$$103 \quad \text{Cell efficiency (\%)} = \frac{1.25}{1.84} \times 100\% = 67.9\%$$



## 105 References

106

- 107 1. Y.-C. Lin, S. Aulia, M.-H. Yeh, L.-Y. Hsiao, A. M. Tarigan and K.-C. Ho, *Journal of*  
108 *Colloid and Interface Science*, 2023.
- 109 2. F. Dong, H. Duan, Z. Lin, H. Yuan, M. Ju, X. Du, J. Gao, J. Yu and S. Yang, *Applied*  
110 *Catalysis B: Environmental*, 2023, 123242.
- 111 3. M. Yu, G. Moon, E. Bill and H. Tüysüz, *ACS Applied Energy Materials*, 2019, **2**, 1199-  
112 1209.
- 113 4. H. Wang, Y. Yan, W. Zhang, S. Sun and S. Yao, *Journal of Solid State Chemistry*, 2023,  
114 **323**, 124048.
- 115 5. Y. Qiao, Y. Pan, J. Zhang, B. Wang, T. Wu, W. Fan, Y. Cao, R. Mehmood, F. Zhang and  
116 F. Zhang, *Chinese Journal of Catalysis*, 2022, **43**, 2354-2362.
- 117 6. X. Liu, X. Zhao, S. Cao, M. Xu, Y. Wang, W. Xue and J. Li, *Applied Catalysis B:*  
118 *Environmental*, 2023, **331**, 122715.
- 119 7. R. A. Raimundo, V. D. Silva, E. S. Medeiros, D. A. Macedo, T. A. Simões, U. U. Gomes,  
120 M. A. Morales and R. M. Gomes, *Journal of Physics and Chemistry of Solids*, 2020, **139**,  
121 109325.
- 122 8. J. Zhu, R. Lu, W. Shi, L. Gong, D. Chen, P. Wang, L. Chen, J. Wu, S. Mu and Y. Zhao,  
123 *Energy & Environmental Materials*, 2023, **6**, e12318.
- 124 9. H. Li, C. Zhang, W. Xiang, M. A. Amin, J. Na, S. Wang, J. Yu and Y. Yamauchi,  
125 *Chemical Engineering Journal*, 2023, **452**, 139104.
- 126 10. L. Fan, P. Zhang, B. Zhang, Q. Daniel, B. J. Timmer, F. Zhang and L. Sun, *ACS Energy*  
127 *Letters*, 2018, **3**, 2865-2874.
- 128 11. C. Kou, J. Han, H. Wang, M. Han and H. Liang, *Progress in Natural Science: Materials*  
129 *International*, 2023, **33**, 74-82.
- 130 12. K. Zhang, T. Wan, H. Wang, Y. Luo, Y. Shi, Z. Zhang, G. Liu and J. Li, *Journal of*  
131 *Colloid and Interface Science*, 2023, **645**, 66-75.
- 132 13. N. Yu, W. Cao, M. Huttula, Y. Kayser, P. Hoenicke, B. Beckhoff, F. Lai, R. Dong, H.  
133 Sun and B. Geng, *Applied Catalysis B: Environmental*, 2020, **261**, 118193.
- 134 14. D. T. Tran, H. T. Le, N. H. Kim and J. H. Lee, *Nano Energy*, 2021, **84**, 105861.
- 135 15. Y. Shi, X. Feng, H. Guan, J. Zhang and Z. Hu, *International Journal of Hydrogen Energy*,  
136 2021, **46**, 8557-8566.
- 137 16. L. Zhang, T. Wang, H. Wu, H. Wang and F. Wang, *Journal of Alloys and Compounds*,  
138 2022, **918**, 165564.
- 139 17. M. Li, Y. Li, J. Wang and Q. Zhong, *Journal of Electroanalytical Chemistry*, 2022, **922**,  
140 116764.
- 141 18. F. Diao, W. Huang, G. Ctistis, H. Wackerbarth, Y. Yang, P. Si, J. Zhang, X. Xiao and C.  
142 Engelbrekt, *ACS Applied Materials & Interfaces*, 2021, **13**, 23702-23713.
- 143 19. G. Zhao, B. Wang, Q. Yan and X. Xia, *Journal of Alloys and Compounds*, 2022, **902**,  
144 163738.
- 145 20. Y. Lu, C. Liu, Y. Xing, Q. Xu, A. M. S. Hossain, D. Jiang, D. Li and J. Zhu, *Journal of*  
146 *Colloid and Interface Science*, 2021, **604**, 680-690.
- 147 21. Y. Zou, B. Xiao, J.-W. Shi, H. Hao, D. Ma, Y. Lv, G. Sun, J. Li and Y. Cheng,  
148 *Electrochimica Acta*, 2020, **348**, 136339.

- 149 22. S.-W. Park, I. Kim, S.-I. Oh, J.-C. Kim and D.-W. Kim, *Journal of Catalysis*, 2018, **366**,  
150 266-274.
- 151 23. G. A. Lindquist, S. Z. Oener, R. Krivina, A. R. Motz, A. Keane, C. Capuano, K. E. Ayers  
152 and S. W. Boettcher, *ACS Applied Materials & Interfaces*, 2021, **13**, 51917-51924.
- 153 24. A. Lim, H.-j. Kim, D. Henkensmeier, S. J. Yoo, J. Y. Kim, S. Y. Lee, Y.-E. Sung, J. H.  
154 Jang and H. S. Park, *Journal of Industrial and Engineering Chemistry*, 2019, **76**, 410-418.
- 155 25. D. Li, E. J. Park, W. Zhu, Q. Shi, Y. Zhou, H. Tian, Y. Lin, A. Serov, B. Zulevi and E. D.  
156 Baca, *Nature Energy*, 2020, **5**, 378-385.
- 157 26. D. Xu, M. B. Stevens, M. R. Cosby, S. Z. Oener, A. M. Smith, L. J. Enman, K. E. Ayers,  
158 C. B. Capuano, J. N. Renner and N. Danilovic, *ACS Catalysis*, 2018, **9**, 7-15.
- 159 27. C. C. Pavel, F. Cecconi, C. Emiliani, S. Santiccioli, A. Scaffidi, S. Catanorchi and M.  
160 Comotti, *Angewandte Chemie International Edition*, 2014, **53**, 1378-1381.
- 161 28. Y. S. Park, J. H. Lee, M. J. Jang, J. Jeong, S. M. Park, W.-S. Choi, Y. Kim, J. Yang and S.  
162 M. Choi, *International Journal of Hydrogen Energy*, 2020, **45**, 36-45.
- 163 29. L. Xiao, S. Zhang, J. Pan, C. Yang, M. He, L. Zhuang and J. Lu, *Energy &*  
164 *Environmental Science*, 2012, **5**, 7869-7871.
- 165 30. Y. Leng, G. Chen, A. J. Mendoza, T. B. Tighe, M. A. Hickner and C.-Y. Wang, *Journal*  
166 *of the American Chemical Society*, 2012, **134**, 9054-9057.
- 167 31. J. Chang, Q. Lv, G. Li, J. Ge, C. Liu and W. Xing, *Applied Catalysis B: Environmental*,  
168 2017, **204**, 486-496.
- 169 32. J. Chang, L. Liang, C. Li, M. Wang, J. Ge, C. Liu and W. Xing, *Green Chemistry*, 2016,  
170 **18**, 2287-2295.
- 171 33. X. Wu and K. Scott, *International journal of hydrogen energy*, 2013, **38**, 3123-3129.
- 172 34. T. Pandiarajan, L. J. Berchmans and S. Ravichandran, *RSC Advances*, 2015, **5**, 34100-  
173 34108.
- 174 35. M. K. Cho, H.-Y. Park, H. J. Lee, H.-J. Kim, A. Lim, D. Henkensmeier, S. J. Yoo, J. Y.  
175 Kim, S. Y. Lee and H. S. Park, *Journal of Power Sources*, 2018, **382**, 22-29.
- 176 36. S. H. Ahn, S. J. Yoo, H.-J. Kim, D. Henkensmeier, S. W. Nam, S.-K. Kim and J. H. Jang,  
177 *Applied Catalysis B: Environmental*, 2016, **180**, 674-679.
- 178 37. L. Zeng and T. Zhao, *Nano Energy*, 2015, **11**, 110-118.
- 179 38. Y.-C. Cao, X. Wu and K. Scott, *International journal of hydrogen energy*, 2012, **37**,  
180 9524-9528.
- 181 39. D. Chanda, J. Hnát, T. Bystron, M. Paidar and K. Bouzek, *Journal of Power Sources*,  
182 2017, **347**, 247-258.
- 183 40. X. Wu and K. Scott, *Journal of Power Sources*, 2012, **214**, 124-129.
- 184 41. Y. S. Park, J. Jeong, Y. Noh, M. J. Jang, J. Lee, K. H. Lee, D. C. Lim, M. H. Seo, W. B.  
185 Kim, J. Yang and S. M. Choi, *Applied Catalysis B: Environmental*, 2021, **292**, 120170.

186
